# Supplementary material
Source: ML conference proceedings conference paper supplement (https://openaccess.thecvf.com/content/CVPR2026/html/Sun_Instance-level_Visual_Active_CVPR_2026_paper.html)
Supplement: Supplementary file 1 [file Sun_Instance-level_Visual_Active_CVPR_2026_supplemental.pdf]

# Supplementary Materials for “Instance-level Visual Active Tracking with Occlusion-Aware Planning”

We organize the supplementary materials as follows. Section A reviews related work on visual active tracking. Section B presents the complete theoretical analysis and proofs of our instance prototype. Section C provides implementation details and hyperparameter analysis. Section D reports additional results from both simulation and real-world experiments.

## A. Related Work

**Visual Active Tracking.** Most VAT methods fall into two categories. RL-based methods [4, 6, 12, 16, 19] learn end-to-end policies that map observations to actions, enabling low-latency control. However, they rely on sparse rewards that lead to slow convergence in complex scenes. To address this, EVT [19] uses offline RL to improve sample efficiency, and GC-VAT [12] employs curriculum learning [21, 22] to progressively guide policy optimization. Despite these advances, RL-based trackers still suffer from poor real-world performance due to the sim-to-real gap.

Pipeline methods [1, 7, 14, 18] decouple tracking into perception and control stages. FAn [7] uses foundation models like SAM [5] and DINOv2 [9] to detect the target and feed the predicted bounding box to a PID controller [8] for tracking. Although benefiting from strong visual models, these methods struggle to distinguish the target instance from distractors because most visual models are trained for category-level recognition. Besides, the controllers often struggle to recover tracking under occlusions. Recent extensions like TrackVLA [14] enhance the perception stage by incorporating language instructions based on an LLM, achieving SOTA performance. However, this improvement comes at high computational cost, which degrades performance in high-dynamic scenarios. Drawing inspiration from prototype-based historical representation [7, 20] and diffusion-based planning methods [2, 14], we propose an instance prototype for precise target matching and a diffusion-based planner to recover lost targets under occlusions.

## B. Theoretical Analysis on Instance Prototype

**Notations.** For any target instance  $T_k$ , we define its true feature manifold  $M_k$  as the set of all features extracted

by  $\text{Desc}(\cdot)$  under arbitrary imaging conditions. From this manifold, the normalized reference features of  $T_k$  are obtained via Eq. (2) (in the main text) and denoted by the set  $F_k^*$ . For each reference feature  $f_k^* \in F_k^*$ , we generate a corresponding set of multi-view augmented features  $\{f_{k,i}\}_{i=1}^N$ . The mean of the augmented features, denoted  $F_{\text{avg},k}$ , is given by:  $F_{\text{avg},k} = \frac{1}{N} \sum_{i=1}^N f_{k,i}$ . The instance-aware prototypes are then derived via Eq. (3) (in the main text) and form the set  $\hat{F}_k$ . Finally, for any manifold  $M$ , we use  $\mathbb{E}_{g \sim M}[\cdot]$  to denote expectation over  $M$ .

**Assumption 1 (Multi-View Global Coverage)** For any target  $T_k$ , when the number of augmented views  $N$  is sufficiently large, the multi-view augmented features  $\{f_{k,i}\}_{i=1}^N$  cover the true feature manifold  $M_k$  well enough such that the average squared distance from any point on the manifold to the augmented features is bounded by that of  $f_k^*$ :

$$\mathbb{E}_{g \sim M_k} \left[ \frac{1}{N} \sum_{i=1}^N \|f_{k,i} - g\|_2^2 \right] \leq \mathbb{E}_{g \sim M_k} [\|f_k^* - g\|_2^2]. \quad (1)$$

Assumption 1 captures that multi-view augmentation better covers the global structure of  $M_k$ , thereby reducing average distance to the manifold.

**Assumption 2 (Manifold Cohesion and Separation)** There exist constants  $\delta \in (0, 1)$ ,  $\eta \in (-1, 1)$  such that for any features  $g_1, g_2$  belonging to the same target manifold  $M_k$ , their cosine similarity satisfies  $S(g_1, g_2) \geq \delta$  (intra-manifold cohesion), while for any features  $g_k \in M_k$  and  $g_j \in M_j$  from distinct targets  $T_k \neq T_j$ , the similarity satisfies  $S(g_k, g_j) \leq \eta$  (inter-manifold separation).

Assumption 2 ensures cohesive features within the same target and well-separated features across different targets.

**Lemma 1** For any target  $T_k$ , the expected value of the squared Euclidean distance between  $F_{\text{avg},k}$  and manifold  $M_k$  is no larger than that between  $f_k^*$  and manifold  $M_k$ :

$$\mathbb{E}_{g \sim M_k} [\|F_{\text{avg},k} - g\|_2^2] \leq \mathbb{E}_{g \sim M_k} [\|f_k^* - g\|_2^2]. \quad (2)$$

**Proof 1** For any fixed  $g \in M_k$ , the squared Euclidean distance  $\|a - g\|_2^2$  is a convex function of  $a$ . By Jensen's inequality, for the multi-view augmented features set  $\{f_{k,i}\}$ :

$$\left\| \frac{1}{N} \sum_{i=1}^N f_{k,i} - g \right\|_2^2 \leq \frac{1}{N} \sum_{i=1}^N \|f_{k,i} - g\|_2^2, \quad (3)$$

$$\|F_{avg,k} - g\|_2^2 \leq \frac{1}{N} \sum_{i=1}^N \|f_{k,i} - g\|_2^2. \quad (4)$$

Take the expectation of both sides of Eq. (4) over  $g \sim M_k$ . For brevity, we denote this expectation by  $\mathbb{E}[\cdot]$ .

$$\mathbb{E} [\|F_{avg,k} - g\|_2^2] \leq \mathbb{E} \left[ \frac{1}{N} \sum_{i=1}^N \|f_{k,i} - g\|_2^2 \right]. \quad (5)$$

By Assumption 1, RHS of Eq. (5) is bounded by:

$$\mathbb{E} \left[ \frac{1}{N} \sum_{i=1}^N \|f_{k,i} - g\|_2^2 \right] \leq \mathbb{E} [\|f_k^* - g\|_2^2]. \quad (6)$$

Combining Eq. (5) and Eq. (6):

$$\mathbb{E} [\|F_{avg,k} - g\|_2^2] \leq \mathbb{E} [\|f_k^* - g\|_2^2]. \quad (7)$$

**Lemma 2** For any target  $T_k$ , the expected value of the squared Euclidean distance between  $\hat{f}_k$  and manifold  $M_k$  is smaller than that between  $f_k^*$  and manifold  $M_k$ :

$$\mathbb{E}_{g \sim M_k} [\|\hat{f}_k - g\|_2^2] \leq \mathbb{E}_{g \sim M_k} [\|f_k^* - g\|_2^2]. \quad (8)$$

**Proof 2** For unit vectors  $a, b$ , the squared Euclidean distance can be rewritten using inner product:

$$\|a - b\|_2^2 = 2 - 2a \cdot b. \quad (9)$$

Applying Eq. (9) to  $\hat{f}_k$  and  $f_k^*$ , Lemma 2 reduces to proving:

$$\mathbb{E}_{g \sim M_k} [\hat{f}_k \cdot g] \geq \mathbb{E}_{g \sim M_k} [f_k^* \cdot g]. \quad (10)$$

For brevity, we denote this expectation by  $\mathbb{E}[\cdot]$ . Substituting the definition of  $\hat{f}_k$  into the left-hand side of Eq. (10) gives:

$$\mathbb{E} [\hat{f}_k \cdot g] = \frac{\mathbb{E} [(f_k^* + F_{avg,k}) \cdot g]}{\|f_k^* + F_{avg,k}\|_2}. \quad (11)$$

By linearity of expectation, the expectation term expands to:

$$\mathbb{E} [(f_k^* + F_{avg,k}) \cdot g] = \mathbb{E} [f_k^* \cdot g] + \mathbb{E} [F_{avg,k} \cdot g]. \quad (12)$$

By Lemma 1 and Eq. (9), we have:

$$2 - 2\mathbb{E} [F_{avg,k} \cdot g] \leq 2 - 2\mathbb{E} [f_k^* \cdot g], \quad (13)$$

simplifying gives:

$$\mathbb{E} [F_{avg,k} \cdot g] \geq \mathbb{E} [f_k^* \cdot g] = \mu. \quad (14)$$

Substitute Eq. (14) into Eq. (13):

$$\mathbb{E} [(f_k^* + F_{avg,k}) \cdot g] \geq 2\mu. \quad (15)$$

We now bound  $\|f_k^* + F_{avg,k}\|_2$  (denoted as  $L$ ). By Assumption 2,  $f_k^* \cdot F_{avg,k} \geq \delta$ , and  $\|F_{avg,k}\|_2^2 \geq \delta$ . Thus,

$$L \geq \sqrt{1 + 3\delta}. \quad (16)$$

By the triangle inequality,  $L \leq \|f_k^*\|_2 + \|F_{avg,k}\|_2$ . Thus,

$$L \leq 2. \quad (17)$$

Substitute Eq. (15), Eq. (16) and Eq. (17) into (11):

$$\mathbb{E} [\hat{f}_k \cdot g] \geq \mu. \quad (18)$$

This proves Eq. (10), and thus the lemma.

**Proposition 1** For any two distinct targets  $T_k \neq T_j$ , the minimum squared distance between any pair of prototype features ( $\hat{f}_k, \hat{f}_j$ ) sampled from  $\hat{F}_k$  and  $\hat{F}_j$  is larger than the minimum squared distance between any pair of reference features ( $f_k^*, f_j^*$ ) sampled from  $F_k^*$  and  $F_j^*$ :

$$\min_{\hat{f}_k \in \hat{F}_k, \hat{f}_j \in \hat{F}_j} \|\hat{f}_k - \hat{f}_j\|_2^2 \geq \min_{f_k^* \in F_k^*, f_j^* \in F_j^*} \|f_k^* - f_j^*\|_2^2. \quad (19)$$

**Proof 3** Since all features are unit vectors, proving the inequality is equivalent to proving:

$$\max_{\hat{f}_k, \hat{f}_j} \hat{f}_k \cdot \hat{f}_j \leq \max_{f_k^*, f_j^*} f_k^* \cdot f_j^*. \quad (20)$$

By Assumption 2 and Lemma 2, there exists a constant  $\epsilon > 0$  such that:

$$\max_{\hat{f}_k, \hat{f}_j} \hat{f}_k \cdot \hat{f}_j \leq \eta + \epsilon \leq \max_{f_k^*, f_j^*} f_k^* \cdot f_j^*. \quad (21)$$

Therefore:

$$\min_{\hat{f}_k, \hat{f}_j} \|\hat{f}_k - \hat{f}_j\|_2^2 \geq \min_{f_k^*, f_j^*} \|f_k^* - f_j^*\|_2^2. \quad (22)$$

## C. More Details of OA-VAT

### C.1. Implementation Details

We train OA-VAT for 60 epochs using a batch size of 64 on a single RTX 3090 GPU, with the entire training process taking about 15 hours. We extract image features using the pre-trained `dinov3_vitl16` (300M parameters) [11], which processes  $384 \times 384$  input images and output 768-dimensional features. Moreover, we generate candidate

Table 1. Comprehensive ablation studies on key hyperparameters. We analyze the EMA momentum  $\beta$ , Kalman filter parameters ( $\gamma$ ,  $\lambda$ ), and the feature descriptor model size. Models B, H+ and L refer to `dinov3.vitb16`, `dinov3.vith+16` and `dinov3.vitl16`, respectively. **Bold** indicates the best performance, underline indicates the second best. Default settings are marked with a light blue background.

| Parameter                         | Value | Parking Lot (2D) |               |               | UrbanCity (4D) |               |               | ComplexRoom (4D) |               |               | Avg.          |               |               |
|-----------------------------------|-------|------------------|---------------|---------------|----------------|---------------|---------------|------------------|---------------|---------------|---------------|---------------|---------------|
|                                   |       | AR $\uparrow$    | EL $\uparrow$ | SR $\uparrow$ | AR $\uparrow$  | EL $\uparrow$ | SR $\uparrow$ | AR $\uparrow$    | EL $\uparrow$ | SR $\uparrow$ | AR $\uparrow$ | EL $\uparrow$ | SR $\uparrow$ |
| EMA Momentum ( $\beta$ )          | 0.6   | 378              | <b>485</b>    | <u>0.91</u>   | 381            | <u>485</u>    | <u>0.92</u>   | <b>402</b>       | <b>487</b>    | <b>0.95</b>   | <u>387</u>    | <b>486</b>    | <b>0.93</b>   |
|                                   | 0.7   | 381              | 484           | <u>0.91</u>   | 378            | 483           | 0.91          | 400              | 480           | <u>0.93</u>   | 386           | 482           | <u>0.92</u>   |
|                                   | 0.8   | <b>392</b>       | 482           | <b>0.93</b>   | <b>385</b>     | <b>486</b>    | <b>0.95</b>   | 392              | <u>481</u>    | 0.92          | <b>390</b>    | <u>483</u>    | <b>0.93</b>   |
|                                   | 0.9   | <u>383</u>       | 472           | 0.90          | 366            | 471           | 0.89          | 393              | 479           | 0.91          | 381           | 474           | 0.90          |
| Kalman Filter Center ( $\gamma$ ) | 0.3   | <u>385</u>       | 469           | <u>0.91</u>   | <u>381</u>     | 471           | <u>0.92</u>   | <u>397</u>       | <u>488</u>    | <u>0.93</u>   | <u>388</u>    | 476           | <u>0.92</u>   |
|                                   | 0.4   | <b>392</b>       | <u>482</u>    | <b>0.93</b>   | <b>385</b>     | <b>486</b>    | <b>0.95</b>   | 392              | 481           | 0.92          | <b>390</b>    | <u>483</u>    | <b>0.93</b>   |
|                                   | 0.5   | 381              | <b>490</b>    | <b>0.93</b>   | 365            | 467           | 0.90          | <b>416</b>       | <b>495</b>    | <b>0.97</b>   | 387           | <b>484</b>    | <b>0.93</b>   |
| Kalman Filter Slope ( $\lambda$ ) | 13    | <u>387</u>       | 477           | 0.91          | 361            | 470           | 0.87          | <b>418</b>       | <b>495</b>    | <b>0.96</b>   | <u>389</u>    | 481           | <u>0.91</u>   |
|                                   | 15    | <b>392</b>       | <b>482</b>    | <b>0.93</b>   | <b>385</b>     | <b>486</b>    | <b>0.95</b>   | 392              | 481           | 0.92          | <b>390</b>    | <b>483</b>    | <b>0.93</b>   |
|                                   | 17    | 375              | 472           | 0.90          | <u>381</u>     | <u>483</u>    | <u>0.94</u>   | <u>414</u>       | <u>490</u>    | <u>0.94</u>   | <b>390</b>    | <u>482</u>    | <b>0.93</b>   |
| Feature Descriptor (DINOv3) Size  | B     | <u>389</u>       | <b>485</b>    | <b>0.93</b>   | <b>395</b>     | 479           | 0.89          | <b>406</b>       | <b>484</b>    | <b>0.95</b>   | <b>397</b>    | <u>483</u>    | <u>0.92</u>   |
|                                   | L     | <b>392</b>       | 482           | <b>0.93</b>   | <u>385</u>     | <b>486</b>    | <b>0.95</b>   | 392              | <u>481</u>    | 0.92          | <u>390</u>    | <u>483</u>    | <b>0.93</b>   |
|                                   | H+    | 388              | <u>484</u>    | <b>0.93</b>   | 377            | <u>485</u>    | <u>0.92</u>   | <u>400</u>       | <b>484</b>    | <u>0.94</u>   | 388           | <b>484</b>    | <b>0.93</b>   |

Table 2. Results on UnrealCV benchmark. **Bold** represents the best while underline represents the second.

| Trackers      | Publication | SimpleRoom |            |             | Parking Lot |            |             | UrbanCity  |            |             | UrbanRoad  |            |             | Snow Village |            |             |
|---------------|-------------|------------|------------|-------------|-------------|------------|-------------|------------|------------|-------------|------------|------------|-------------|--------------|------------|-------------|
|               |             | AR         | EL         | SR          | AR          | EL         | SR          | AR         | EL         | SR          | AR         | EL         | SR          | AR           | EL         | SR          |
| DiMP [1]      | ICCV 2019   | 336        | <b>500</b> | <b>1.00</b> | 166         | 327        | 0.48        | 239        | 401        | 0.66        | 168        | 308        | 0.33        | 110          | 301        | 0.43        |
| SARL [6]      | TPAMI 2019  | 368        | <b>500</b> | <b>1.00</b> | 92          | 301        | 0.22        | 331        | 471        | 0.86        | 207        | 378        | 0.48        | 203          | 318        | 0.31        |
| AD-VAT [15]   | ICLR 2019   | 356        | <b>500</b> | <b>1.00</b> | 86          | 302        | 0.20        | 335        | 484        | 0.88        | 246        | 429        | 0.60        | 169          | 364        | 0.44        |
| AD-VAT+ [16]  | TPAMI 2019  | 373        | <b>500</b> | <b>1.00</b> | 267         | 439        | 0.60        | <u>389</u> | <u>497</u> | <u>0.94</u> | 326        | 471        | 0.80        | 182          | 365        | 0.44        |
| TS [17]       | ICML 2021   | <b>412</b> | <b>500</b> | <b>1.00</b> | 265         | 472        | 0.89        | 341        | 496        | <u>0.94</u> | 308        | 480        | 0.84        | 234          | 424        | 0.63        |
| RSPT [18]     | AAAI 2023   | <u>398</u> | <b>500</b> | <b>1.00</b> | <u>314</u>  | 480        | 0.80        | 341        | <b>500</b> | <b>1.00</b> | <u>346</u> | <b>500</b> | <b>1.00</b> | 248          | 410        | 0.80        |
| EVT [19]      | ECCV 2024   | 374        | <b>500</b> | <b>1.00</b> | 274         | 484        | 0.92        | 306        | <b>500</b> | <b>1.00</b> | <u>300</u> | 496        | <u>0.96</u> | 229          | <u>471</u> | 0.87        |
| FAn [7]       | RAL 2024    | 318        | <b>500</b> | <b>1.00</b> | 215         | 481        | <u>0.96</u> | 193        | 466        | 0.90        | 152        | 409        | 0.76        | 306          | 456        | 0.90        |
| FAn+SAM2 [10] | ICLR 2025   | 329        | <b>500</b> | <b>1.00</b> | 215         | <u>491</u> | <u>0.96</u> | 217        | 470        | 0.92        | 207        | 442        | 0.90        | <u>317</u>   | 465        | <u>0.94</u> |
| TrackVLA [14] | CoRL 2025   | -          | <b>500</b> | <b>1.00</b> | -           | <b>500</b> | <b>1.00</b> | -          | <b>500</b> | <b>1.00</b> | -          | <b>500</b> | <b>1.00</b> | -            | <b>500</b> | <b>1.00</b> |
| <b>Ours</b>   | CVPR 2026   | 389        | <b>500</b> | <b>1.00</b> | <b>382</b>  | <b>500</b> | <b>1.00</b> | <b>390</b> | <b>500</b> | <b>1.00</b> | <b>401</b> | <b>500</b> | <b>1.00</b> | <b>391</b>   | <b>500</b> | <b>1.00</b> |

masks using the `yolo-e-l11-seg` model [13], and select the candidate with the highest similarity exceeding the matching threshold  $\eta_s = 0.5$  as the target. During tracking, the visual prototype is updated online via an exponential moving average (EMA):

$$\tilde{\mathbf{f}}' \leftarrow \beta \tilde{\mathbf{f}}' + (1 - \beta) \hat{\mathbf{f}}_{\text{tar}}, \quad (23)$$

where the EMA momentum  $\beta$  is set to 0.8. Additionally, we employ a confidence-aware Kalman filter, where the measurement noise covariance  $\mathbf{R}_t$  is modeled as a function of the detection confidence  $c_t$ :

$$\mathbf{R}_t = \sigma^2(c_t) \mathbf{I}, \quad \sigma^2(c_t) = \frac{1}{1 + e^{\lambda \cdot (c_t - \gamma)}}, \quad (24)$$

where the hyperparameters are set to  $\lambda = 15.0$  and  $\gamma = 0.4$ .

## C.2. Hyperparameter Analysis

We perform ablation experiments to analyze the influence of key hyperparameters in the OA-VAT method, including the EMA momentum  $\beta$  of the online visual prototype enhancement module, the parameters ( $\lambda$ ,  $\gamma$ ) of the confidence-aware Kalman filter, and the model size of the feature extractor.

**EMA Momentum.** We first analyze the effect of the momentum coefficient  $\beta$  in the EMA update of the online prototype enhancement module, as shown in Eq. (23). We conducted experiments with  $\beta$  set to 0.6, 0.7, 0.8, and 0.9. As shown in Tab. 1 (rows 1-4), OA-VAT exhibits consistently strong performance across all settings, and our default choice of  $\beta = 0.8$  achieves the best results, providing a good balance between historical and current observations.

**Kalman Filter Parameters.** We then analyze the parameters of the confidence-aware Kalman filter in Eq. (24).

To evaluate the effect of  $\lambda$ , we compare the default setting  $\lambda = 15$  with  $\lambda = 13$  and  $\lambda = 17$  (Tab.1 rows 5-7). We then compare the default  $\gamma = 0.4$  with  $\gamma = 0.3$  and  $\gamma = 0.5$ , as shown in Tab.1 (rows 8-10). The results demonstrate that OA-VAT is robust to hyperparameter variations.

**Feature Extractor Size.** To demonstrate the effectiveness of OA-VAT across models of different sizes, we evaluate its performance by comparing the default feature extractor `dinov3_vitl16` (300M parameters), with `dinov3_vitb16` (86M) and `dinov3_vith16` (840M) variants. As shown in Tab. 1 (Rows 11–13), replacing the 300M extractor with the smaller 86M variant results in only a 1.1% relative performance drop, indicating that OA-VAT is highly robust across model sizes.

## D. More Experimental Results

### D.1. Comparison Experiments

**Details of Baselines.** We compare OA-VAT against 12 baselines: DiMP [1] combines a pre-trained passive tracker with a PID [8] controller. SARL [6] is an end-to-end RL tracker with a Conv-LSTM backbone. AD-VAT [15] and AD-VAT+ [16] use an asymmetric dueling RL framework with adversarial learning. RSPT [18] leverages RGB-D input for structure-aware tracking. Cross-modal Teacher-Student (TS) [17] employs a cross-modal teacher-student strategy for distraction-robust tracking. EVT [19] integrates visual foundation models with offline RL for efficient embodied tracking. Follow Anything (FAn) [7] enables open-vocabulary tracking by combining foundation models, and FAn+SAM2 replaces its segmentation module with the latest SAM2 [10] model. D-VAT [4] maps RGB observations directly to continuous control signals through reinforcement learning. GC-VAT [12] designs a goal-centered reward for effective tracking in complex environments. Track-VLA [14] unifies target recognition and tracking within a single VLA framework built upon an LLM backbone.

**Additional Results on UnrealCV.** We evaluate all methods on the UnrealCV benchmark for single-target tracking in five distinct virtual scenes: SimpleRoom, Parking Lot, UrbanCity, UrbanRoad, and Snow Village, with detailed results presented in Tab. 2. OA-VAT achieves the highest success rate ( $SR = 1.00$ ) across all five scenes, with zero target loss ( $EL = 500$ ) in every episode.

### D.2. Experiments in Real-world Scenarios

To evaluate the real-world applicability and robustness of OA-VAT, we deploy it on a *DJI Tello* drone. We use the `DJITelloPy` library [3] to capture video streams (at a resolution of  $320 \times 240$ ) from the drone, transmit them over the network to a ground station equipped with an NVIDIA RTX 3090 GPU, and return the control signals generated by OA-VAT. The drone operates in velocity control mode, with

control commands including linear and angular velocities. The entire pipeline runs at approximately 35 FPS in our experiments. We then evaluate OA-VAT on two challenging scenarios: long-term tracking with occlusions, and specific instance discrimination against same-category distractors.

**Effectiveness in Long-Term Tracking.** OA-VAT shows superior performance over all baselines in long-term real-robot tracking. It can actively plan collision-free paths and recover the occluded target, as shown in Fig. 6 of the main article. However, as illustrated in Fig. 1(a), FAn [7] lacks a planning module, causing the robot to stop when the target remains occluded for an extended period, leading to tracking failure. Moreover, as shown in Fig. 1(b), EVT [19] method, which adopts an offline RL-based planner, still produces incorrect plans under occlusion and fails to navigate around obstacles to recover the target. *Full long-term tracking videos of OA-VAT, FAn, and EVT methods are provided in the supplementary video.*

**Effectiveness Under Distractors.** As shown in Fig. 2, we evaluate OA-VAT under distractors, where the person in black is the true target and the one in red is the distractor. During online tracking, OA-VAT robustly tracks the correct target and remains unaffected when only the distractor is visible, as illustrated in the bottom-left subfigure of Fig. 2.

## References

- [1] Goutam Bhat, Martin Danelljan, Luc Van Gool, and Radu Timofte. Learning discriminative model prediction for tracking. In *Proceedings of the IEEE/CVF international conference on computer vision*, pages 6182–6191, 2019. 1, 3, 4
- [2] Cheng Chi, Zhenjia Xu, Siyuan Feng, Eric Cousineau, Yilun Du, Benjamin Burchfiel, Russ Tedrake, and Shuran Song. Diffusion policy: Visuomotor policy learning via action diffusion. *The International Journal of Robotics Research*, 2024. 1
- [3] damiafuentes. `DjitelloPy`. <https://github.com/damiafuentes/DJITelloPy>, 2025. 4
- [4] Alberto Dionigi, Simone Felicioni, Mirko Leomanni, and Gabriele Costante. D-vat: End-to-end visual active tracking for micro aerial vehicles. *IEEE Robotics and Automation Letters*, 9(6):5046–5053, 2024. 1, 4
- [5] Alexander Kirillov, Eric Mintun, Nikhila Ravi, Hanzi Mao, Chloe Rolland, Laura Gustafson, Tete Xiao, Spencer Whitehead, Alexander C Berg, Wan-Yen Lo, et al. Segment anything. In *Proceedings of the IEEE/CVF international conference on computer vision*, pages 4015–4026, 2023. 1
- [6] Wenhan Luo, Peng Sun, Fangwei Zhong, Wei Liu, Tong Zhang, and Yizhou Wang. End-to-end active object tracking and its real-world deployment via reinforcement learning. *IEEE transactions on pattern analysis and machine intelligence*, 42(6):1317–1332, 2019. 1, 3, 4
- [7] Alaa Maalouf, Ninad Jadhav, Krishna Murthy Jatavallabhula, Makram Chahine, Daniel M Vogt, Robert J Wood, Antonio Torralba, and Daniela Rus. Follow anything: Open-set detection, tracking, and following in real-time. *IEEE*

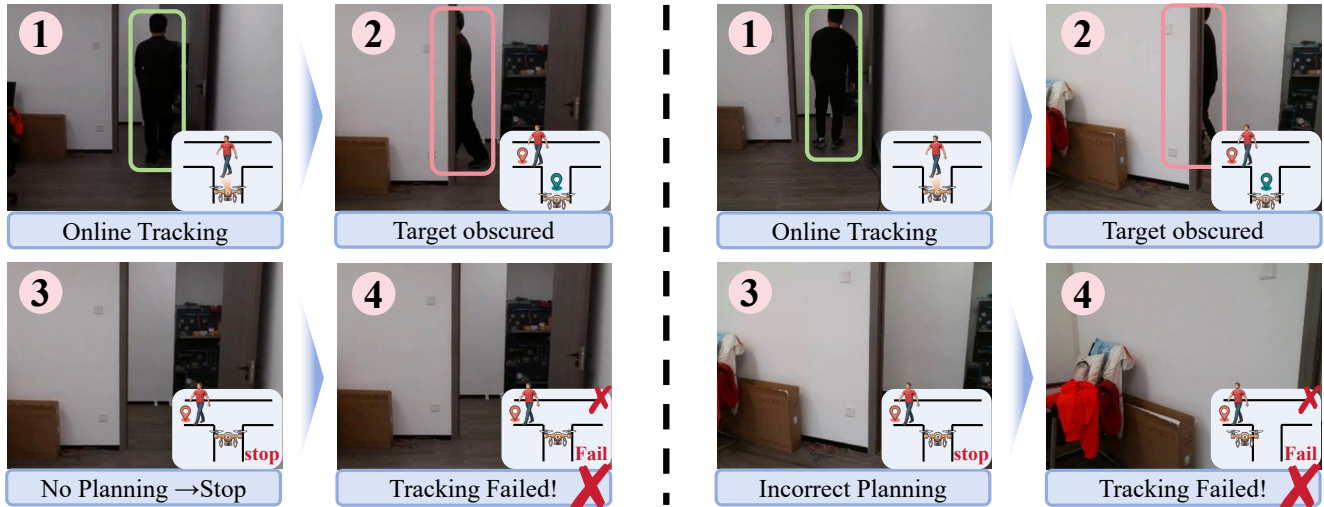

(a) FAn fails to plan when the target is occluded.

(b) EVT performs incorrect planning under target occlusion.

Figure 1. Failure cases of the baseline method FAn [7] and EVT [19] on real drone *DJI Tello*.

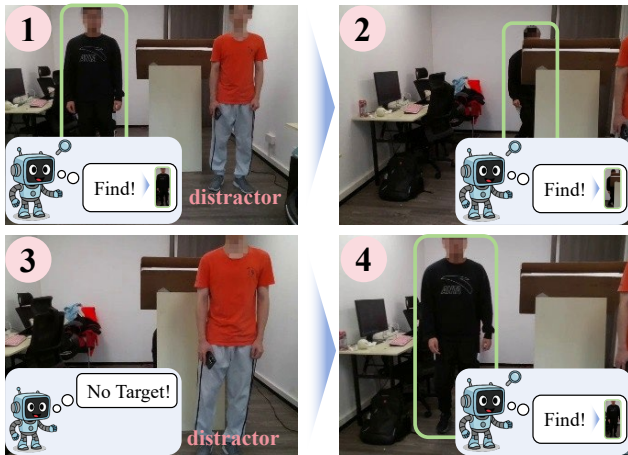

Figure 2. OA-VAT accurately detects the target against distractors.

*Robotics and Automation Letters*, 9(4):3283–3290, 2024. 1, 3, 4, 5

- [8] Nicolas Minorsky. Directional stability of automatically steered bodies. *Journal of the American Society for Naval Engineers*, 34(2):280–309, 1922. 1, 4
- [9] Maxime Oquab, Timothée Darcet, Theo Moutakanni, Huy V. Vo, Marc Szafraniec, Vasil Khalidov, Pierre Fernandez, Daniel Haziza, Francisco Massa, Alaaeldin El-Nouby, Russell Howes, Po-Yao Huang, Hu Xu, Vasu Sharma, Shang-Wen Li, Wojciech Galuba, Mike Rabbat, Mido Assran, Nicolas Ballas, Gabriel Synnaeve, Ishan Misra, Herve Jegou, Julien Mairal, Patrick Labatut, Armand Joulin, and Piotr Bojanowski. Dinov2: Learning robust visual features without supervision, 2023. 1
- [10] Nikhila Ravi, Valentin Gabeur, Yuan-Ting Hu, Ronghang Hu, Chaitanya Ryali, Tengyu Ma, Haitham Khedr, Roman

Rädle, Chloe Rolland, Laura Gustafson, et al. Sam 2: Segment anything in images and videos. *arXiv preprint arXiv:2408.00714*, 2024. 3, 4

- [11] Oriane Siméoni, Huy V Vo, Maximilian Seitzer, Federico Baldassarre, Maxime Oquab, Cijo Jose, Vasil Khalidov, Marc Szafraniec, Seungeun Yi, Michaël Ramamonjisoa, et al. Dinov3. *arXiv preprint arXiv:2508.10104*, 2025. 2
- [12] Haowei Sun, Jinwu Hu, Zhirui Zhang, Haoyuan Tian, Xinze Xie, Yufeng Wang, Xiaohua Xie, Yun Lin, Zhuliang Yu, and Mingkui Tan. Open-world drone active tracking with goal-centered rewards. In *The Thirty-ninth Annual Conference on Neural Information Processing Systems*, 2025. 1, 4
- [13] Ao Wang, Lihao Liu, Hui Chen, Zijia Lin, Jungong Han, and Guiguang Ding. Yoloe: Real-time seeing anything. In *Proceedings of the IEEE/CVF International Conference on Computer Vision*, pages 24591–24602, 2025. 3
- [14] Shaoan Wang, Jiazhao Zhang, Minghan Li, Jiahang Liu, Anqi Li, Kui Wu, Fangwei Zhong, Junzhi Yu, Zhizheng Zhang, and He Wang. Trackvla: Embodied visual tracking in the wild. *arXiv preprint arXiv:2505.23189*, 2025. 1, 3, 4
- [15] Fangwei Zhong, Peng Sun, Wenhan Luo, Tingyun Yan, and Yizhou Wang. Ad-vat: An asymmetric dueling mechanism for learning visual active tracking. In *International Conference on Learning Representations*, 2019. 3, 4
- [16] Fangwei Zhong, Peng Sun, Wenhan Luo, Tingyun Yan, and Yizhou Wang. Ad-vat+: An asymmetric dueling mechanism for learning and understanding visual active tracking. *IEEE transactions on pattern analysis and machine intelligence*, 43(5):1467–1482, 2019. 1, 3, 4
- [17] Fangwei Zhong, Peng Sun, Wenhan Luo, Tingyun Yan, and Yizhou Wang. Towards distraction-robust active visual tracking. In *International Conference on Machine Learning*, pages 12782–12792. PMLR, 2021. 3, 4
- [18] Fangwei Zhong, Xiao Bi, Yudi Zhang, Wei Zhang, and Yizhou Wang. Rspt: reconstruct surroundings and predict

- trajectory for generalizable active object tracking. In *Proceedings of the AAAI Conference on Artificial Intelligence*, pages 3705–3714, 2023. [1](#), [3](#), [4](#)
- [19] Fangwei Zhong, Kui Wu, Hai Ci, Churan Wang, and Hao Chen. Empowering embodied visual tracking with visual foundation models and offline rl. In *European Conference on Computer Vision*, pages 139–155. Springer, 2024. [1](#), [3](#), [4](#), [5](#)
- [20] Kai Zhou, Shuhai Zhang, Zeng You, Jinwu Hu, Mingkui Tan, and Fei Liu. Zero-shot skeleton-based action recognition with prototype-guided feature alignment. *IEEE Transactions on Image Processing*, 34:4602–4617, 2025. [1](#)
- [21] Yuwei Zhou, Hong Chen, Zirui Pan, Chuanhao Yan, Fanqi Lin, Xin Wang, and Wenwu Zhu. Curml: A curriculum machine learning library. In *Proceedings of the 30th ACM International Conference on Multimedia*, pages 7359–7363, 2022. [1](#)
- [22] Yuwei Zhou, Zirui Pan, Xin Wang, Hong Chen, Haoyang Li, Yanwen Huang, Zhixiao Xiong, Fangzhou Xiong, Peiyang Xu, Wenwu Zhu, et al. Curbench: curriculum learning benchmark. In *Forty-first International Conference on Machine Learning*, 2024. [1](#)
